# Supplementary material
Source: MDPI journal article supplement (https://www.mdpi.com/2073-4352/13/6/947)
Supplement: s1 [file s1]

## Supporting information for this article:

**Figure S1: The IR spectras of 1-3**

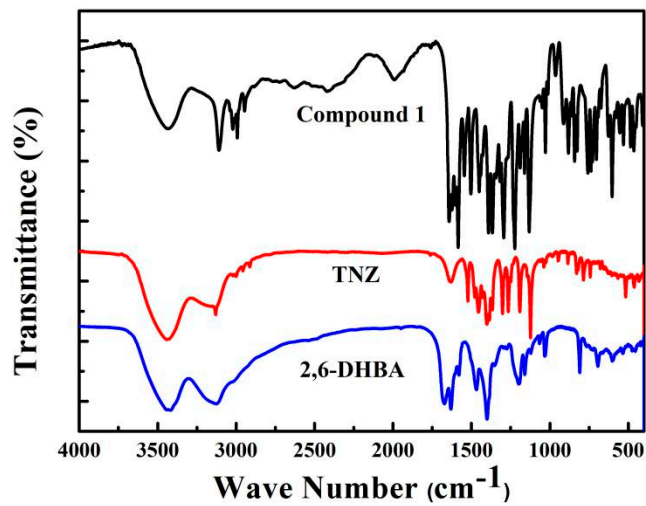

The IR spectra of 1

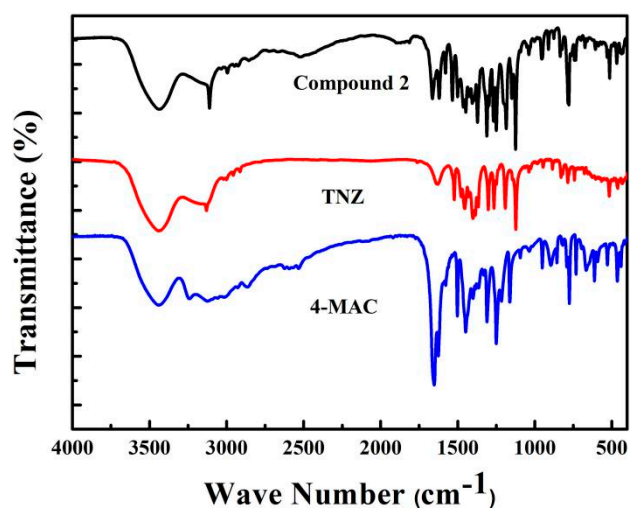

The IR spectra of 2

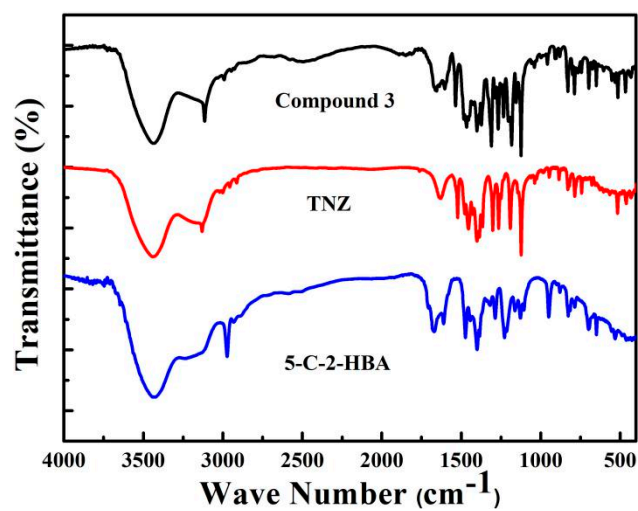

The IR spectra of 3

**Figure S2: Thermogravimetric analysis (TGA) curves of compounds**

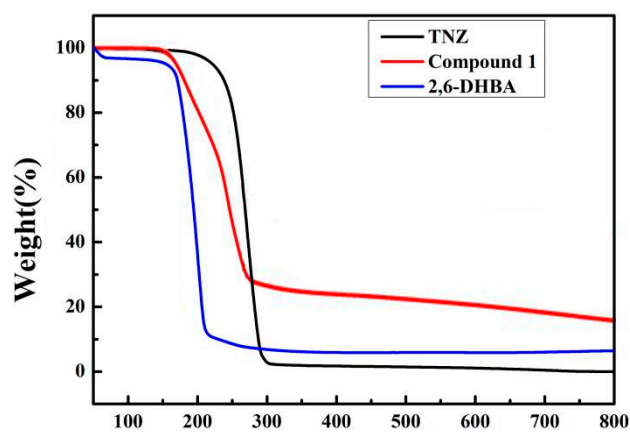

The TGA curve of 1

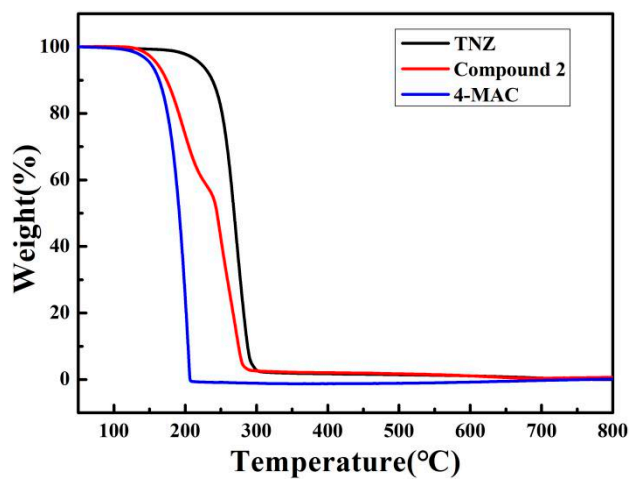

The TGA curve of **2**

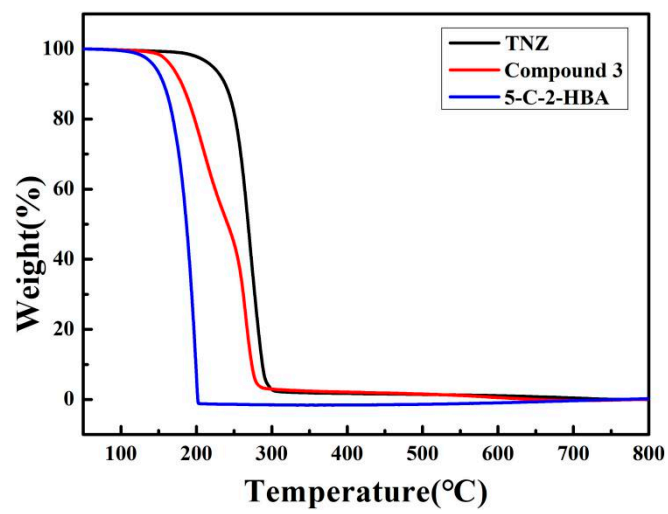

The TGA curve of **3**
